# Supplementary material
Source: MDPI journal article supplement (https://www.mdpi.com/2297-8739/11/1/8)
Supplement: s1 [file s1]

## Supplementary S1

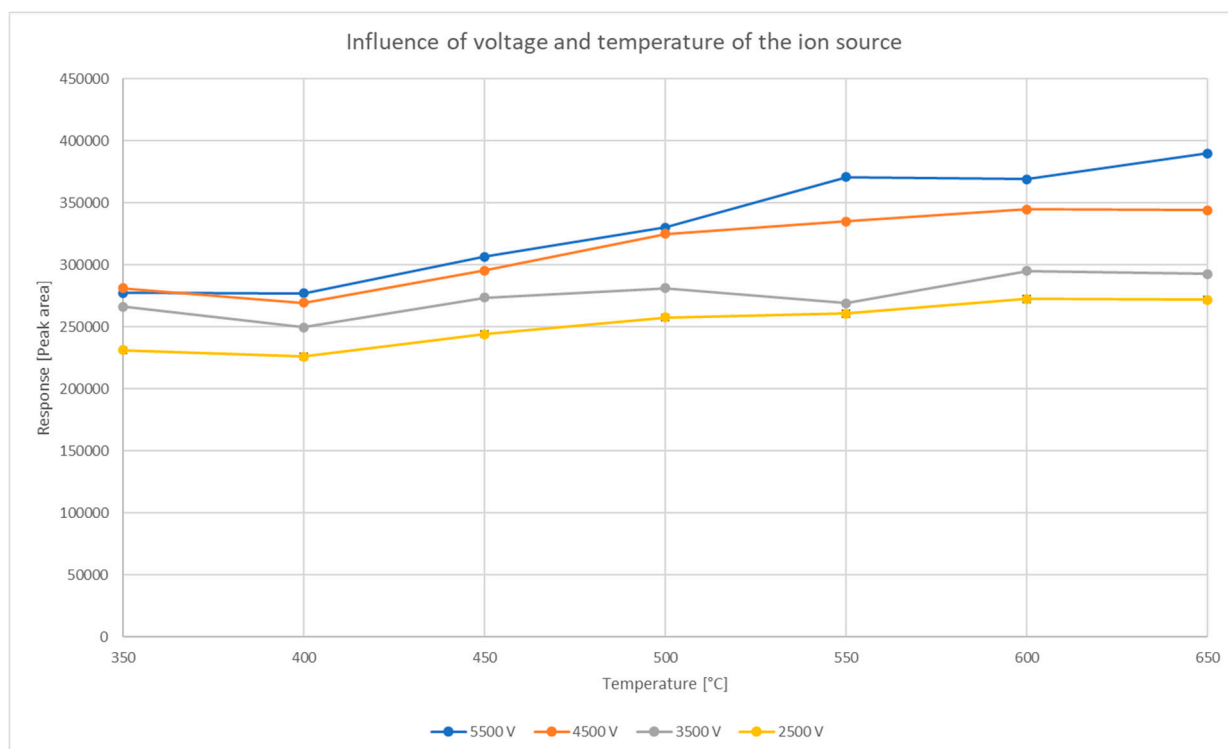

**Figure S1:** Averages of the peak areas in dependence of ion source voltage and temperature (n=3). For the data see tab. 1.

**Table S1:** Averages of the peak areas in dependence of ion source voltage and temperature (n=3).

|               | 350°C  | 400°C  | 450°C  | 500°C  | 550°C  | 600°C  | 650°C  |
|---------------|--------|--------|--------|--------|--------|--------|--------|
| <b>5500 V</b> | 277433 | 277041 | 306553 | 330094 | 370746 | 369071 | 389877 |
| <b>4500 V</b> | 281113 | 269428 | 295380 | 324823 | 335046 | 344683 | 343940 |
| <b>3500 V</b> | 266163 | 249626 | 273360 | 281174 | 268865 | 294849 | 292671 |
| <b>2500 V</b> | 231062 | 225964 | 244018 | 257413 | 260554 | 272372 | 271746 |

**Table S2:** Standard deviations of the peak areas in dependence of Ion Source voltage and temperature (n=3).

|               | 350°C | 400°C | 450°C | 500°C | 550°C | 600°C | 650°C |
|---------------|-------|-------|-------|-------|-------|-------|-------|
| <b>5500 V</b> | 2220  | 1762  | 609   | 1726  | 1596  | 2904  | 4123  |
| <b>4500 V</b> | 2803  | 917   | 5323  | 3046  | 625   | 1239  | 4211  |
| <b>3500 V</b> | 11049 | 266   | 2147  | 2518  | 8575  | 1141  | 212   |
| <b>2500 V</b> | 12245 | 259   | 3007  | 2594  | 6434  | 1874  | 2226  |

**Table S3:** RSD of the peak areas in dependance of Ion Source voltage and temperature (n=3).

|               | 350°C | 400°C | 450°C | 500°C | 550°C | 600°C | 650°C |
|---------------|-------|-------|-------|-------|-------|-------|-------|
| <b>5500 V</b> | 0.80% | 0.64% | 0.20% | 0.52% | 0.43% | 0.79% | 1.06% |
| <b>4500 V</b> | 1.00% | 0.34% | 1.80% | 0.94% | 0.19% | 0.36% | 1.22% |
| <b>3500 V</b> | 4.15% | 0.11% | 0.79% | 0.90% | 3.19% | 0.39% | 0.07% |
| <b>2500 V</b> | 5.30% | 0.11% | 1.23% | 1.01% | 2.47% | 0.69% | 0.82% |
